# Supplementary material
Source: HighWire-hosted journal article supplement (https://cmaj.ca/highwire/filestream/99472/field_highwire_adjunct_files/7/210873-res-8-at.pdf)
Supplement: 210873-res-8-at.pdf [file 210873-res-8-at.pdf]

Supplementary Figure 5 - Cardiac involvement in 190 Canadian children admitted to hospital with MIS-C by quarter of the year

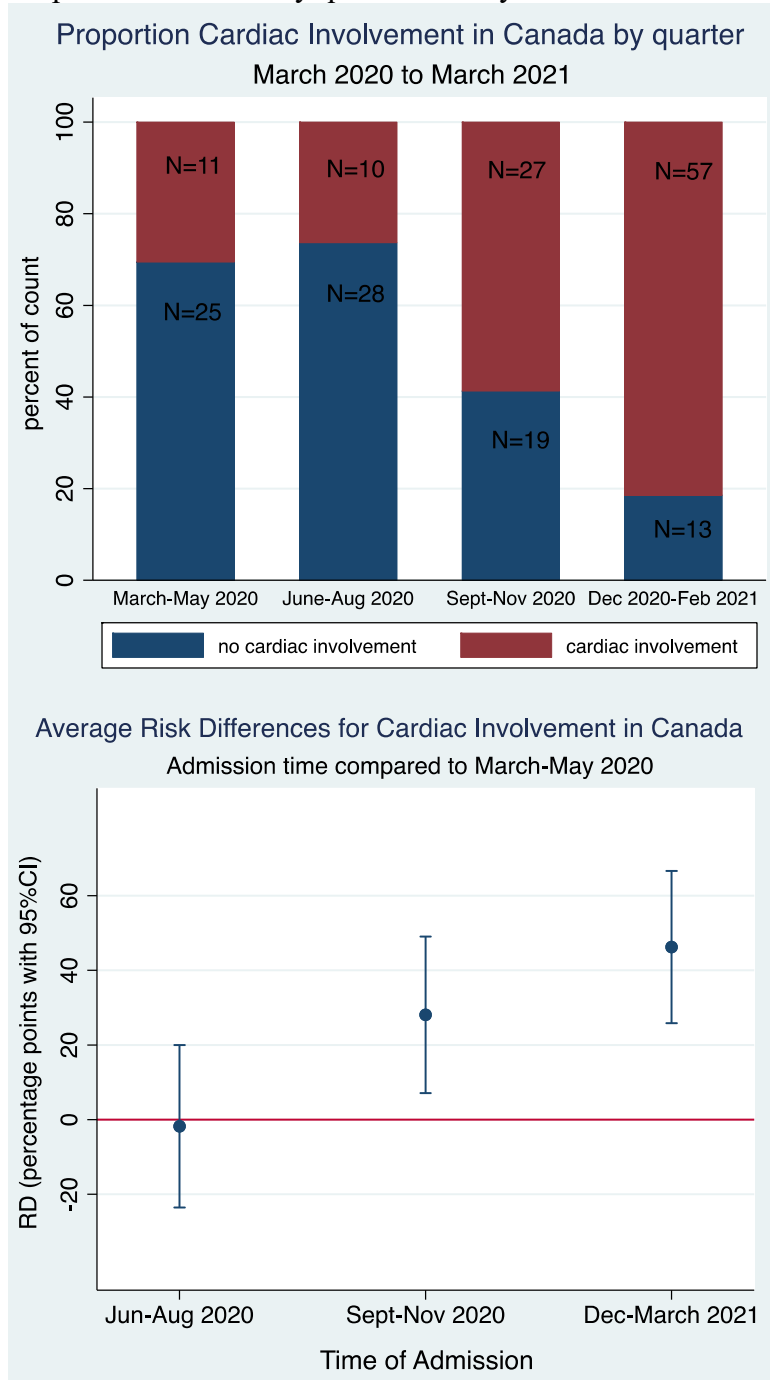

Panel A

Panel

B

Cardiac involvement was defined as features of myocardial dysfunction, pericarditis, valvulitis, or coronary abnormalities (including echocardiographic findings or elevated Troponin/NT-proBNP)

Panel A: N is the absolute number of cases in the group. The Y-axis reflects the proportion of total cases admitted per quarter.

Panel B: Association time of admission and severe disease, defined as need for ICU admission in Canada. Average marginal effects are presented with adjusted RDs from the multivariable logistic regression. The reference used for RDs is admission to the hospital March-May 2020 with a diagnosis of MIS-C. Model is adjusted for sex, age, country, presence of comorbidity, coinfection, confirmed case status.
